# Supplementary material for: A structural equation model for imaging genetics using spatial transcriptomics
Source: PubMed Central journal article supplement (PMC6429169; doi:10.1186/s40708-018-0091-0), 2018-11-02
Supplement: 40708_2018_91_MOESM1_ESM.pdf [file 40708_2018_91_MOESM1_ESM.pdf]

**Additional Table S1** All brain regions used in the ADNI section, with their region group code, manually annotated ABA region, ADNI code, and ADNI description. Region group codes: CrCortex = cerebral cortex; Hippocam = hippocampal formation; Amygdala = amygdala; Striatum = striatum; DorsThal = dorsal thalamus; SubCort1 = sub-cortical regions 1; SubCort2 = sub-cortical regions 2; ClCortex = cerebellar cortex; SulcSpac = sulci and spaces.

| Region group code | ABA region            | ADNI code | ADNI description                                            |
|-------------------|-----------------------|-----------|-------------------------------------------------------------|
| CrCortex          | cingulate gyrus       | ST14TA    | Cortical Thickness Average of LeftCaudalAnteriorCingulate   |
| CrCortex          | cingulate gyrus       | ST34TA    | Cortical Thickness Average of LeftIsthmusCingulate          |
| CrCortex          | cingulate gyrus       | ST50TA    | Cortical Thickness Average of LeftPosteriorCingulate        |
| CrCortex          | cingulate gyrus       | ST54TA    | Cortical Thickness Average of LeftRostralAnteriorCingulate  |
| CrCortex          | cingulate gyrus       | ST73TA    | Cortical Thickness Average of RightCaudalAnteriorCingulate  |
| CrCortex          | cingulate gyrus       | ST93TA    | Cortical Thickness Average of RightIsthmusCingulate         |
| CrCortex          | cingulate gyrus       | ST109TA   | Cortical Thickness Average of RightPosteriorCingulate       |
| CrCortex          | cingulate gyrus       | ST113TA   | Cortical Thickness Average of RightRostralAnteriorCingulate |
| CrCortex          | frontal lobe          | ST25TA    | Cortical Thickness Average of LeftFrontalPole               |
| CrCortex          | frontal lobe          | ST36TA    | Cortical Thickness Average of LeftLateralOrbitofrontal      |
| CrCortex          | frontal lobe          | ST39TA    | Cortical Thickness Average of LeftMedialOrbitofrontal       |
| CrCortex          | frontal lobe          | ST43TA    | Cortical Thickness Average of LeftParacentral               |
| CrCortex          | frontal lobe          | ST45TA    | Cortical Thickness Average of LeftParsOpercularis           |
| CrCortex          | frontal lobe          | ST46TA    | Cortical Thickness Average of LeftParsOrbitalis             |
| CrCortex          | frontal lobe          | ST47TA    | Cortical Thickness Average of LeftParsTriangularis          |
| CrCortex          | frontal lobe          | ST51TA    | Cortical Thickness Average of LeftPrecentral                |
| CrCortex          | frontal lobe          | ST55TA    | Cortical Thickness Average of LeftRostralMiddleFrontal      |
| CrCortex          | frontal lobe          | ST56TA    | Cortical Thickness Average of LeftSuperiorFrontal           |
| CrCortex          | frontal lobe          | ST84TA    | Cortical Thickness Average of RightFrontalPole              |
| CrCortex          | frontal lobe          | ST95TA    | Cortical Thickness Average of RightLateralOrbitofrontal     |
| CrCortex          | frontal lobe          | ST98TA    | Cortical Thickness Average of RightMedialOrbitofrontal      |
| CrCortex          | frontal lobe          | ST102TA   | Cortical Thickness Average of RightParacentral              |
| CrCortex          | frontal lobe          | ST104TA   | Cortical Thickness Average of RightParsOpercularis          |
| CrCortex          | frontal lobe          | ST105TA   | Cortical Thickness Average of RightParsOrbitalis            |
| CrCortex          | frontal lobe          | ST106TA   | Cortical Thickness Average of RightParsTriangularis         |
| CrCortex          | frontal lobe          | ST110TA   | Cortical Thickness Average of RightPrecentral               |
| CrCortex          | frontal lobe          | ST114TA   | Cortical Thickness Average of RightRostralMiddleFrontal     |
| CrCortex          | frontal lobe          | ST115TA   | Cortical Thickness Average of RightSuperiorFrontal          |
| CrCortex          | insula                | ST129TA   | Cortical Thickness Average of LeftInsula                    |
| CrCortex          | insula                | ST130TA   | Cortical Thickness Average of RightInsula                   |
| CrCortex          | middle frontal gyrus  | ST15TA    | Cortical Thickness Average of LeftCaudalMiddleFrontal       |
| CrCortex          | middle frontal gyrus  | ST74TA    | Cortical Thickness Average of RightCaudalMiddleFrontal      |
| CrCortex          | occipital lobe        | ST23TA    | Cortical Thickness Average of LeftCuneus                    |
| CrCortex          | occipital lobe        | ST35TA    | Cortical Thickness Average of LeftLateralOccipital          |
| CrCortex          | occipital lobe        | ST38TA    | Cortical Thickness Average of LeftLingual                   |
| CrCortex          | occipital lobe        | ST48TA    | Cortical Thickness Average of LeftPericalcarine             |
| CrCortex          | occipital lobe        | ST82TA    | Cortical Thickness Average of RightCuneus                   |
| CrCortex          | occipital lobe        | ST94TA    | Cortical Thickness Average of RightLateralOccipital         |
| CrCortex          | occipital lobe        | ST97TA    | Cortical Thickness Average of RightLingual                  |
| CrCortex          | occipital lobe        | ST107TA   | Cortical Thickness Average of RightPericalcarine            |
| CrCortex          | parahippocampal gyrus | ST44TA    | Cortical Thickness Average of LeftParahippocampal           |
| CrCortex          | parahippocampal gyrus | ST103TA   | Cortical Thickness Average of RightParahippocampal          |
| CrCortex          | parietal lobe         | ST31TA    | Cortical Thickness Average of LeftInferiorParietal          |
| CrCortex          | parietal lobe         | ST49TA    | Cortical Thickness Average of LeftPostcentral               |
| CrCortex          | parietal lobe         | ST52TA    | Cortical Thickness Average of LeftPrecuneus                 |
| CrCortex          | parietal lobe         | ST57TA    | Cortical Thickness Average of LeftSuperiorParietal          |
| CrCortex          | parietal lobe         | ST59TA    | Cortical Thickness Average of LeftSupramarginal             |
| CrCortex          | parietal lobe         | ST90TA    | Cortical Thickness Average of RightInferiorParietal         |
| CrCortex          | parietal lobe         | ST108TA   | Cortical Thickness Average of RightPostcentral              |
| CrCortex          | parietal lobe         | ST111TA   | Cortical Thickness Average of RightPrecuneus                |
| CrCortex          | parietal lobe         | ST116TA   | Cortical Thickness Average of RightSuperiorParietal         |
| CrCortex          | parietal lobe         | ST118TA   | Cortical Thickness Average of RightSupramarginal            |
| CrCortex          | temporal lobe         | ST13TA    | Cortical Thickness Average of LeftBankssts                  |
| CrCortex          | temporal lobe         | ST24TA    | Cortical Thickness Average of LeftEntorhinal                |
| CrCortex          | temporal lobe         | ST26TA    | Cortical Thickness Average of LeftFusiform                  |
| CrCortex          | temporal lobe         | ST32TA    | Cortical Thickness Average of LeftInferiorTemporal          |
| CrCortex          | temporal lobe         | ST40TA    | Cortical Thickness Average of LeftMiddleTemporal            |
| CrCortex          | temporal lobe         | ST58TA    | Cortical Thickness Average of LeftSuperiorTemporal          |
| CrCortex          | temporal lobe         | ST60TA    | Cortical Thickness Average of LeftTemporalPole              |
| CrCortex          | temporal lobe         | ST62TA    | Cortical Thickness Average of LeftTransverseTemporal        |
| CrCortex          | temporal lobe         | ST72TA    | Cortical Thickness Average of RightBankssts                 |
| CrCortex          | temporal lobe         | ST83TA    | Cortical Thickness Average of RightEntorhinal               |
| CrCortex          | temporal lobe         | ST85TA    | Cortical Thickness Average of RightFusiform                 |
| CrCortex          | temporal lobe         | ST91TA    | Cortical Thickness Average of RightInferiorTemporal         |
| CrCortex          | temporal lobe         | ST99TA    | Cortical Thickness Average of RightMiddleTemporal           |
| CrCortex          | temporal lobe         | ST117TA   | Cortical Thickness Average of RightSuperiorTemporal         |
| CrCortex          | temporal lobe         | ST119TA   | Cortical Thickness Average of RightTemporalPole             |
| CrCortex          | temporal lobe         | ST121TA   | Cortical Thickness Average of RightTransverseTemporal       |
| Hippocam          | hippocampal formation | ST29SV    | Volume (WM Parcellation) of LeftHippocampus                 |
| Hippocam          | hippocampal formation | ST88SV    | Volume (WM Parcellation) of RightHippocampus                |
| Amygdala          | amygdala              | ST12SV    | Volume (WM Parcellation) of LeftAmygdala                    |
| Amygdala          | amygdala              | ST71SV    | Volume (WM Parcellation) of RightAmygdala                   |
| Striatum          | striatum              | ST11SV    | Volume (WM Parcellation) of LeftAccumbensArea               |
| Striatum          | striatum              | ST16SV    | Volume (WM Parcellation) of LeftCaudate                     |
| Striatum          | striatum              | ST53SV    | Volume (WM Parcellation) of LeftPutamen                     |
| Striatum          | striatum              | ST70SV    | Volume (WM Parcellation) of RightAccumbensArea              |
| Striatum          | striatum              | ST75SV    | Volume (WM Parcellation) of RightCaudate                    |

### Additional Table S1: Continued

|          |                   |         |                                                           |
|----------|-------------------|---------|-----------------------------------------------------------|
| Striatum | striatum          | ST112SV | Volume (WM Parcellation) of RightPutamen                  |
| DorsThal | dorsal thalamus   | ST61SV  | Volume (WM Parcellation) of LeftThalamus                  |
| DorsThal | dorsal thalamus   | ST120SV | Volume (WM Parcellation) of RightThalamus                 |
| SubCort1 | myelencephalon    | ST1SV   | Volume (WM Parcellation) of Brainstem                     |
| SubCort2 | globus pallidus   | ST42SV  | Volume (WM Parcellation) of LeftPallidum                  |
| SubCort2 | globus pallidus   | ST101SV | Volume (WM Parcellation) of RightPallidum                 |
| SubCort2 | white matter      | ST2SV   | Volume (WM Parcellation) of CorpusCallosumAnterior        |
| SubCort2 | white matter      | ST3SV   | Volume (WM Parcellation) of CorpusCallosumCentral         |
| SubCort2 | white matter      | ST4SV   | Volume (WM Parcellation) of CorpusCallosumMidAnterior     |
| SubCort2 | white matter      | ST5SV   | Volume (WM Parcellation) of CorpusCallosumMidPosterior    |
| SubCort2 | white matter      | ST6SV   | Volume (WM Parcellation) of CorpusCallosumPosterior       |
| SubCort2 | white matter      | ST18SV  | Volume (WM Parcellation) of LeftCerebellumWM              |
| SubCort2 | white matter      | ST20SV  | Volume (WM Parcellation) of LeftCerebralWM                |
| SubCort2 | white matter      | ST69SV  | Volume (WM Parcellation) of OpticChiasm                   |
| SubCort2 | white matter      | ST77SV  | Volume (WM Parcellation) of RightCerebellumWM             |
| SubCort2 | white matter      | ST79SV  | Volume (WM Parcellation) of RightCerebralWM               |
| SubCort2 | white matter      | ST128SV | Volume (WM Parcellation) of WMHypoIntensities             |
| ClCortex | cerebellar cortex | ST17SV  | Volume (WM Parcellation) of LeftCerebellumCortex          |
| ClCortex | cerebellar cortex | ST76SV  | Volume (WM Parcellation) of RightCerebellumCortex         |
| SulcSpac | sulci & spaces    | ST7SV   | Volume (WM Parcellation) of Csf                           |
| SulcSpac | sulci & spaces    | ST9SV   | Volume (WM Parcellation) of FourthVentricle               |
| SulcSpac | sulci & spaces    | ST21SV  | Volume (WM Parcellation) of LeftChoroidPlexus             |
| SulcSpac | sulci & spaces    | ST30SV  | Volume (WM Parcellation) of LeftInferiorLateralVentricle  |
| SulcSpac | sulci & spaces    | ST37SV  | Volume (WM Parcellation) of LeftLateralVentricle          |
| SulcSpac | sulci & spaces    | ST80SV  | Volume (WM Parcellation) of RightChoroidPlexus            |
| SulcSpac | sulci & spaces    | ST89SV  | Volume (WM Parcellation) of RightInferiorLateralVentricle |
| SulcSpac | sulci & spaces    | ST96SV  | Volume (WM Parcellation) of RightLateralVentricle         |
| SulcSpac | sulci & spaces    | ST127SV | Volume (WM Parcellation) of ThirdVentricle                |
