# Supplementary material for: A structural equation model for imaging genetics using spatial transcriptomics
Source: PubMed Central journal article supplement (PMC6429169; doi:10.1186/s40708-018-0091-0), 2018-11-02
Supplement: 40708_2018_91_MOESM2_ESM.pdf [file 40708_2018_91_MOESM2_ESM.pdf]

### Model fit in predicting phenotypes

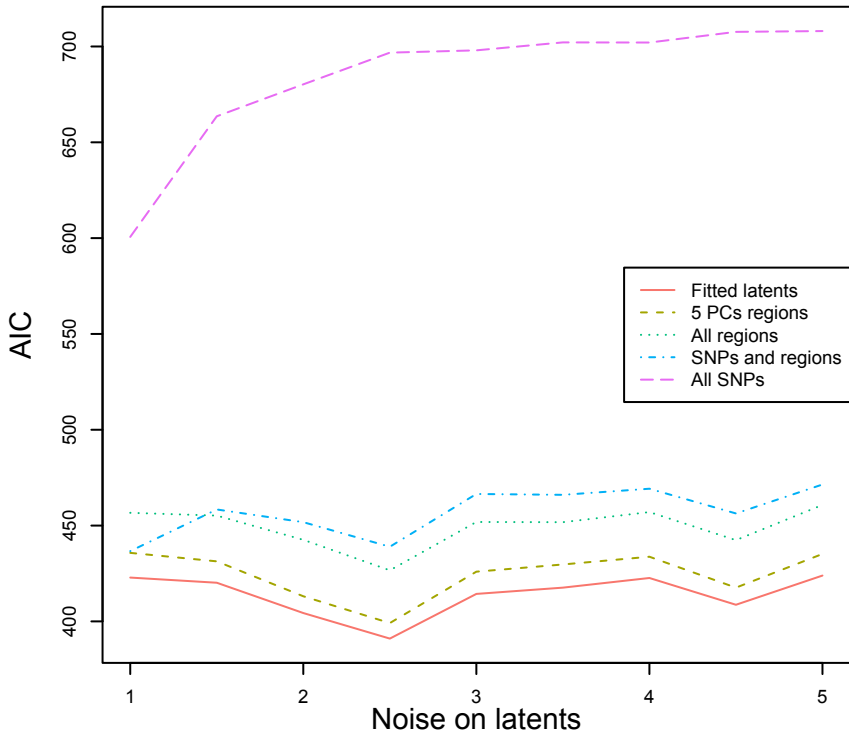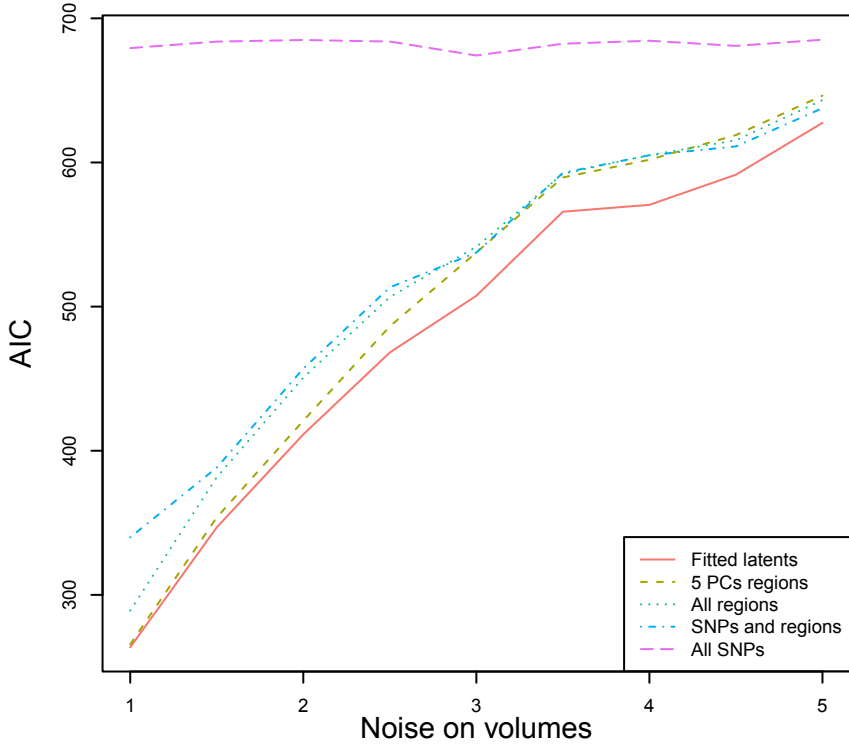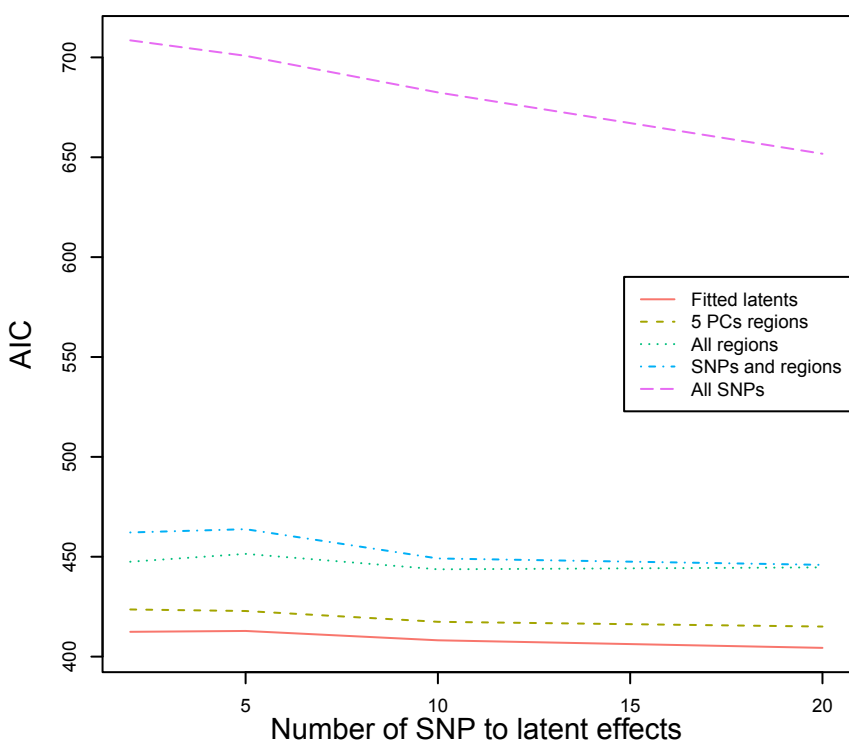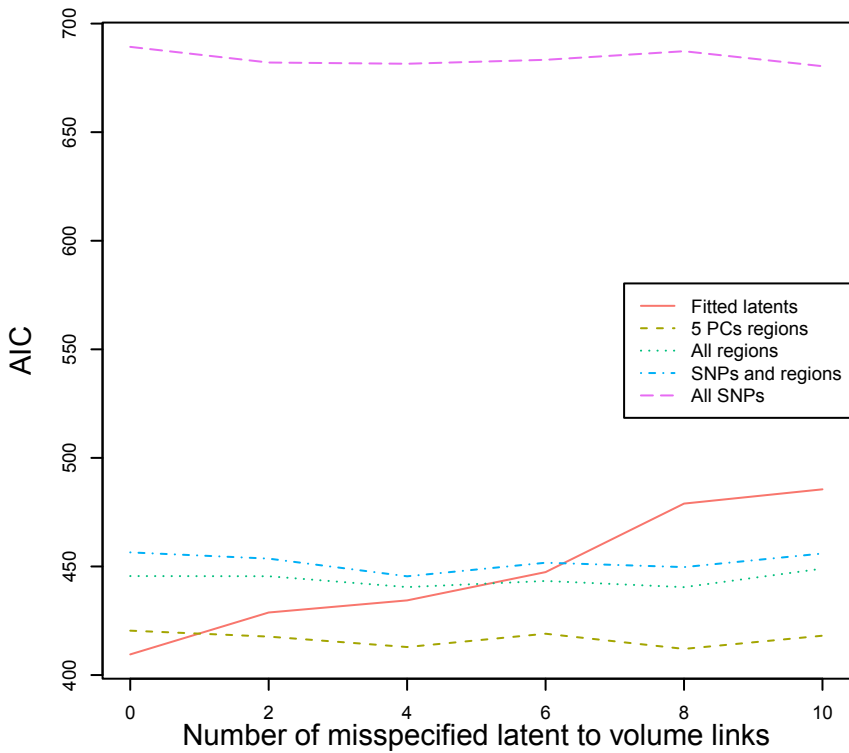

### Identifying SNPs in phenotype prediction

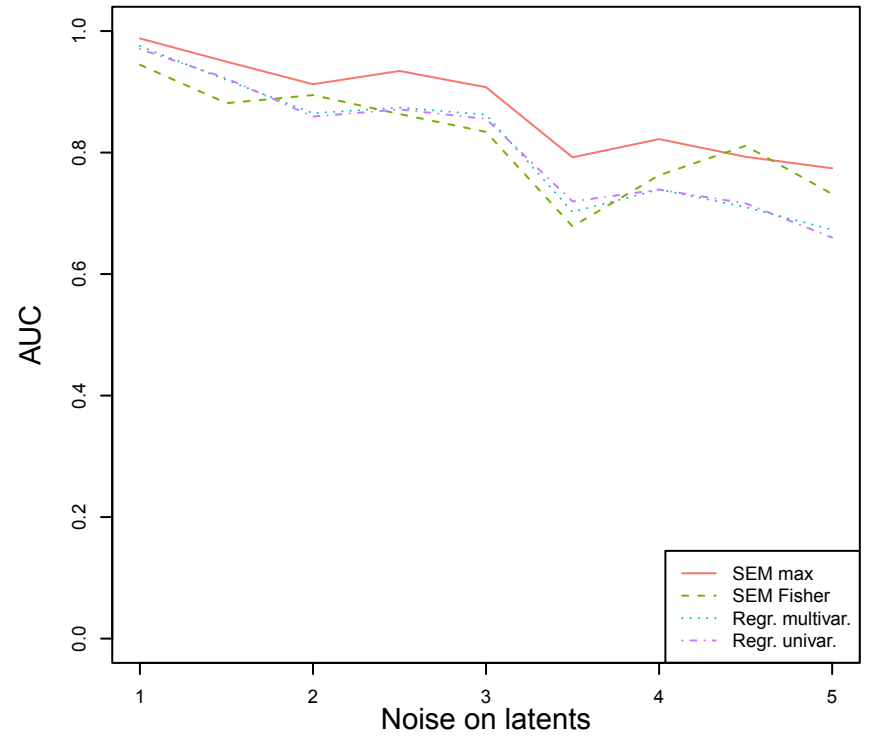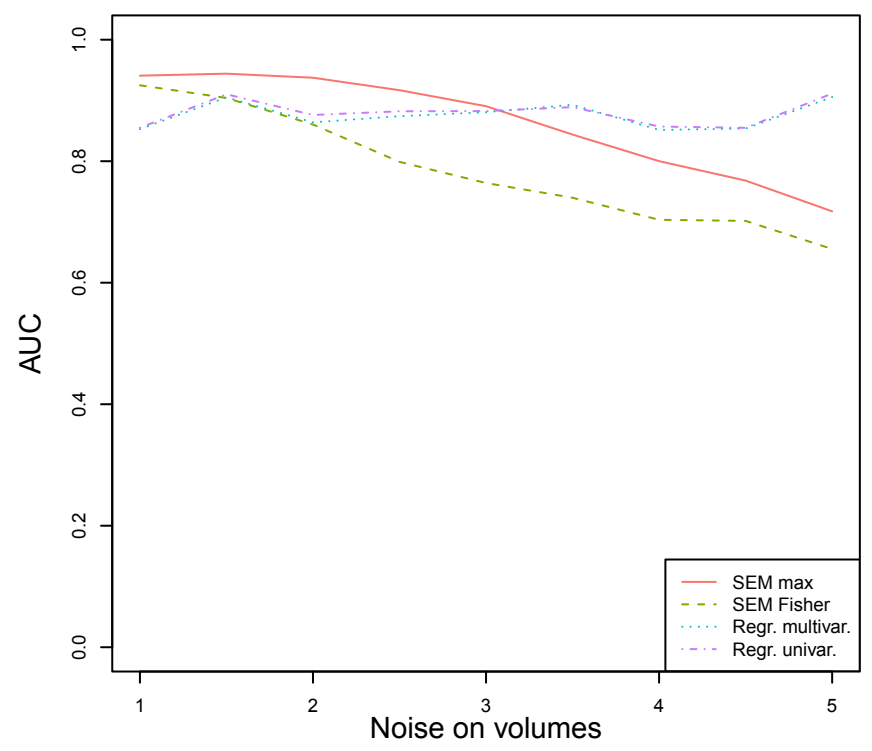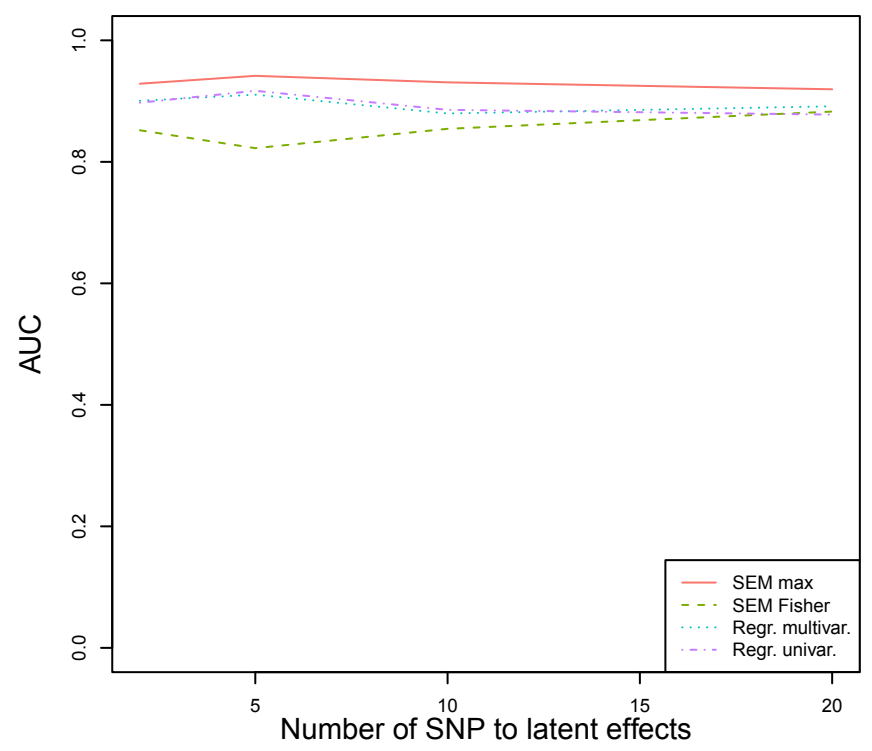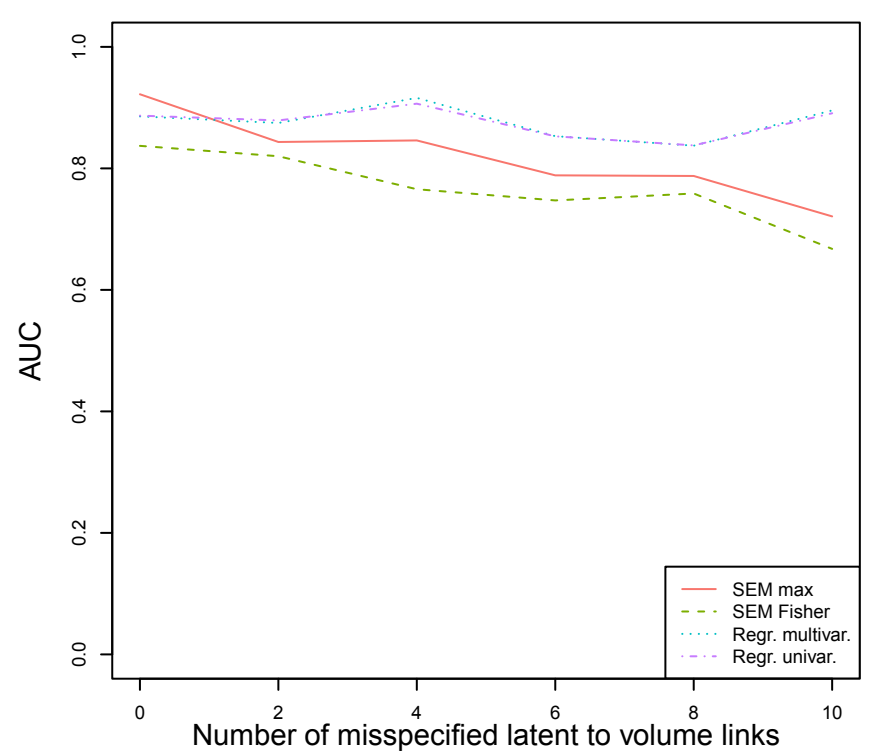

**Additional Fig. S1** Simulations to test model robustness. The plots show a comparison of our model (red) to alternative approaches with varying simulation parameters. We simulated a range of noise on latent variables, noise on volumes, number of SNPs, and number of misspecified latent to volume links.
